# Supplementary material for: Massive introgression drives species radiation at the range limit of Anopheles gambiae
Source: PubMed Central journal article supplement (PMC5394460; doi:10.1038/srep46451), 2017-04-18
Supplement: srep46451-s1.pdf [file srep46451-s1.pdf]

# Is massive introgression driving species radiation at the range limit of *Anopheles gambiae*?

José L. Vicente<sup>1,\*</sup>, Christopher S. Clarkson<sup>2,\*</sup>, Beniamino Caputo<sup>3,\*</sup>, Bruno Gomes<sup>1</sup>, Marco Pombi<sup>3</sup>, Carla A. Sousa<sup>1</sup>, Tiago Antao<sup>2,†</sup>, João Dinis<sup>4</sup>, Giordano Bottà<sup>3,5</sup>, Emiliano Mancini<sup>3, ‡</sup>, Vincenzo Petrarca<sup>3,6</sup>, Daniel Mead<sup>7</sup>, Eleanor Drury<sup>7</sup>, James Stalker<sup>7</sup>, Alistair Miles<sup>5,8</sup>, Dominic P. Kwiatkowski<sup>5,7,8</sup>, Martin J. Donnelly<sup>2</sup>, Amabélia Rodrigues<sup>4</sup>, Alessandra della Torre<sup>3</sup>, David Weetman<sup>2,\*</sup> and João Pinto<sup>1,\*</sup>

1. Global Health & Tropical Medicine, Instituto de Higiene e Medicina Tropical, Universidade Nova de Lisboa, Lisbon, Portugal;
2. Department of Vector Biology, Liverpool School of Tropical Medicine, Liverpool, United Kingdom;
3. Istituto Pasteur Italia-Fondazione Cenci-Bolognetti, Dipartimento di Sanità Pubblica e Malattie Infettive, Università di Roma “Sapienza”, Rome, Italy;
4. Instituto Nacional de Saúde Pública, Ministério da Saúde Pública, Bissau, Guiné-Bissau;
5. Wellcome Trust Centre for Human Genetics, University of Oxford, Oxford, United Kingdom;
6. Istituto Pasteur Italia-Fondazione Cenci-Bolognetti, Dipartimento di Biologia e Biotecnologie “Charles Darwin”, Università di Roma “Sapienza”, Rome, Italy.
7. Wellcome Trust Sanger Institute, Hinxton, UK.
8. Medical Research Council Centre for Genomics and Global Health, University of Oxford, Oxford, UK.

\* These authors contributed equally to this study.

## Supplementary Figures and Tables

**Supplementary Table 1 | Microsatellites used in the study.**

| Chromosome | Locus              | Repeat                              | Dye                                             | Primers                                           | T <sub>A</sub> |
|------------|--------------------|-------------------------------------|-------------------------------------------------|---------------------------------------------------|----------------|
| X          | X6U2 <sup>a</sup>  | (CA) <sub>13</sub>                  | HEX                                             | F*-TTGTTGCTCGGCTTGAAGTA<br>R-GAAGGAATCGAGGGTGCTCT | 60             |
|            | X5D1 <sup>a</sup>  | (CA) <sub>11</sub>                  | NED                                             | F*-GGAAACCGACACCACAAAG<br>R-TGCCATTGAATGATGATGATG | 55             |
|            | X678               | (TC) <sub>7</sub>                   | HEX                                             | F*-CCTCTCCCCAGAATCGGTAC<br>R-AAGAGCAGAAACAACCGCAG | 54             |
|            | X5C1 <sup>a</sup>  | (GT) <sub>10</sub>                  | 6-FAM                                           | F*-TCGCTTCGACAAATCATCAC<br>R-GGGCGAAAATTCGTACAGAG | 60             |
|            | X5B1 <sup>a</sup>  | (CA) <sub>10</sub>                  | NED                                             | F*-CAACAGCGAAAGGGTTATCG<br>R-CAGCAGAACATACACGCACA | 62             |
|            | XH07               | (AT) <sub>3</sub> (GT) <sub>7</sub> | HEX                                             | F*-CACGATGGTTTTCGGTGTGG<br>R-ATTTGAGCTCTCCCGGGTG  | 54             |
|            | XH25               | (GT) <sub>9</sub>                   | 6-FAM                                           | F*-GCCGAAAACATTCCAACAGG<br>R-CAGTTATGTCGGCATGCTAC | 54             |
|            | XH77               | (GT) <sub>10</sub>                  | 6-FAM                                           | F*-TGGGACTGTAAGTGTCTCCC<br>R-TATCAGTGAGCCGAGTTGC  | 54             |
| X145       | (GT) <sub>11</sub> | HEX                                 | F*-TGGTGAATGTGAGACACAG<br>R-ATGATGGTCGATCCTTGTC | 54                                                |                |
| 3L         | H577               | (GT) <sub>16</sub>                  | 6-FAM                                           | F-TTCAGCTTCAGGTTGGTCTC<br>R*-GGGTTTTTGGCTGCGACTG  | 56             |
|            | H758               | (GT) <sub>11</sub>                  | 6-FAM                                           | F*-TGATTTGCCAGTTCTGCCAG<br>R-GTGATTGGAGTGGCTAGTGG | 54             |
|            | H242               | (GT) <sub>8</sub>                   | HEX                                             | F*-TTCATTTCCACCGCAGCTGC<br>R-GGCGACACTCAATCCTTCC  | 56             |
|            | H45C <sup>b</sup>  | (TG) <sub>4+7+4</sub>               | HEX                                             | F*-AAAAGTGGTGACCGAGTGAC<br>R-ATCTTCAACACTTCAGCACG | 54             |
| 3R         | H555               | (GT) <sub>8</sub>                   | NED                                             | F*-GCAGAGACACTTCCGAAAC<br>R-TGTCAACCCACATTTTGCGC  | 54             |
|            | H119               | (GT) <sub>6</sub>                   | HEX                                             | F*-GGTTGATGCTGAAGAGTGGG<br>R-ATGCCAGCGGATACGATTCG | 54             |
|            | H249               | (GT) <sub>15</sub>                  | NED                                             | F*-ATGTTCCGCACTTCCGACAC<br>R-GCGAGCTACAACAATGGAGC | 54             |
|            | H059               | (GT) <sub>9</sub>                   | HEX                                             | F*-CCCCTATTAACCCTGGACG<br>R-TGTTGTTGCCCTGCGTTACC  | 54             |
|            | H128               | (GT) <sub>21</sub>                  | 6-FAM                                           | F*-CGGGACGGCTAGATAAAGCG<br>R-CCGGGCGACATAACCCACCC | 56             |
|            | H093               | (GT) <sub>4+7</sub>                 | NED                                             | F*-TCCCAGCTCACCTTCAAG<br>R-GGTTGCATGTTTGGATAGCG   | 54             |

Dye: Applied Biosystems® fluorescent dye used to label the primer. \* Primer fluorescently labeled; T<sub>A</sub>: annealing temperature; <sup>a</sup> Stump *et al.* 2005. *Genetics* 169, 1509-1519, <sup>b</sup> Lehmann *et al.* 1998. *Mol. Biol. Evol.* 15, 264-276, remaining loci were described in Zheng *et al.* 1996. *Genetics* 143, 941-952.

**Supplementary Table 2 | Genetic diversity estimates per microsatellite locus and locality.**

| Locus  |              | Quinhamel | Safim        | Antula | Mansoa        | Mandingará | Gambana | Comuda       | Leibala       | Mean   |
|--------|--------------|-----------|--------------|--------|---------------|------------|---------|--------------|---------------|--------|
| X6U2   | $Ar_{(100)}$ | 8.1       | 9.2          | 8.3    | 8.6           | 9.7        | 6.2     | 11.2         | 14.4          | 9.4    |
|        | $H_e$        | 0.660     | 0.661        | 0.669  | 0.801         | 0.817      | 0.732   | 0.838        | 0.832         | 0.751  |
|        | $F_{IS}$     | 0.101     | 0.007        | 0.052  | 0.054         | 0.059      | 0.062   | -0.009       | -0.008        | 0.040  |
| X5D1   | $Ar_{(100)}$ | 7.0       | 5.7          | 5.0    | 7.6           | 7.5        | 6.2     | 6.3          | 6.5           | 6.5    |
|        | $H_e$        | 0.543     | 0.526        | 0.614  | 0.587         | 0.661      | 0.618   | 0.709        | 0.640         | 0.612  |
|        | $F_{IS}$     | 0.130     | -0.084       | 0.107  | 0.122         | -0.072     | 0.003   | -0.070       | 0.008         | 0.018  |
| X678   | $Ar_{(100)}$ | 14.7      | 15.2         | 15.7   | 15.7          | 10.2       | 7.8     | 15.3         | 20.0          | 14.3   |
|        | $H_e$        | 0.805     | <b>0.785</b> | 0.796  | 0.834         | 0.646      | 0.531   | 0.870*       | 0.886         | 0.769  |
|        | $F_{IS}$     | 0.044     | 0.124        | -0.054 | 0.170         | 0.240      | 0.068   | <b>0.180</b> | 0.041         | 0.102  |
| X5C1   | $Ar_{(100)}$ | 12.5      | 10.8         | 13.7   | 12.7          | 11.3       | 11.6    | 10.9         | 11.3          | 11.9   |
|        | $H_e$        | 0.825     | 0.801        | 0.819  | 0.843         | 0.842      | 0.835   | 0.819        | 0.846*        | 0.829  |
|        | $F_{IS}$     | 0.044     | 0.092        | 0.055  | 0.063         | 0.106      | -0.077  | <b>0.236</b> | 0.175         | 0.087  |
| X5B1   | $Ar_{(100)}$ | 13.8      | 14.6         | 13.4   | 14.0          | 15.9       | 17.2    | 15.0         | 12.0          | 14.5   |
|        | $H_e$        | 0.851     | 0.810        | 0.817  | <b>0.836*</b> | 0.865      | 0.869   | 0.846        | 0.799         | 0.837  |
|        | $F_{IS}$     | 0.031     | 0.138        | 0.019  | <b>0.346</b>  | 0.102      | 0.023   | -0.012       | 0.112         | 0.095  |
| XH07   | $Ar_{(100)}$ | 8.1       | 8.2          | 7.8    | 7.9           | 10.2       | 7.9     | 8.2          | 7.4           | 8.2    |
|        | $H_e$        | 0.741     | 0.686        | 0.653  | 0.701         | 0.711      | 0.684   | 0.727*       | <b>0.735*</b> | 0.705  |
|        | $F_{IS}$     | -0.009    | 0.233        | 0.095  | 0.172         | 0.157      | 0.151   | <b>0.261</b> | <b>0.410</b>  | 0.184  |
| XH25   | $Ar_{(100)}$ | 8.2       | 8.4          | 8.1    | 7.8           | 7.3        | 7.0     | 8.4          | 8.5           | 8.0    |
|        | $H_e$        | 0.720     | 0.730        | 0.714  | 0.764*        | 0.707      | 0.734   | 0.770        | 0.743         | 0.735  |
|        | $F_{IS}$     | -0.038    | 0.102        | -0.008 | 0.199         | 0.130      | 0.023   | 0.102        | 0.104         | 0.077  |
| XH77   | $Ar_{(100)}$ | 8.6       | 8.5          | 8.8    | 11.5          | 9.5        | 8.4     | 9.6          | 8.9           | 9.2    |
|        | $H_e$        | 0.779     | 0.803        | 0.797  | 0.822         | 0.805      | 0.811   | 0.790        | 0.797         | 0.801  |
|        | $F_{IS}$     | 0.041     | 0.036        | -0.025 | -0.040        | -0.009     | -0.019  | -0.057       | 0.110         | 0.005  |
| X145   | $Ar_{(100)}$ | 6.9       | 7.8          | 7.1    | 9.3           | 7.7        | 7.2     | 7.8          | 7.4           | 7.7    |
|        | $H_e$        | 0.743     | 0.743        | 0.727  | 0.745         | 0.725      | 0.740   | 0.739        | 0.717         | 0.735  |
|        | $F_{IS}$     | -0.066    | 0.147        | -0.020 | -0.061        | -0.057     | 0.031   | -0.056       | 0.011         | -0.009 |
| Mean   | $Ar_{(100)}$ | 9.8       | 9.8          | 9.8    | 10.6          | 9.9        | 8.8     | 10.3         | 10.7          |        |
| X-loci | $H_e$        | 0.741     | 0.727        | 0.734  | 0.770         | 0.753      | 0.728   | 0.790        | 0.777         |        |
|        | $F_{IS}$     | 0.031     | 0.088        | 0.025  | 0.114         | 0.073      | 0.029   | 0.064        | 0.107         |        |

$Ar_{(100)}$ : Allele richness.  $H_e$ : expected heterozygosity (in bold: significant heterozygote deficit).  $F_{IS}$ : inbreeding coefficient (in bold: significant value). Asterisks indicate presence of null alleles determined by Micro-Checker. X-loci: chromosome-X microsatellites; 3-loci: chromosome-3 microsatellites.

**Supplementary Table 2 (continued).**

| Locus         |              | Quinhamel     | Safim         | Antula       | Mansoa       | Mandingará   | Gambana       | Comuda       | Leibala      | Mean   |
|---------------|--------------|---------------|---------------|--------------|--------------|--------------|---------------|--------------|--------------|--------|
| H093          | $Ar_{(100)}$ | 15.2          | 16.5          | 14.0         | 13.8         | 14.5         | 14.2          | 13.2         | 11.6         | 14.1   |
|               | $H_e$        | 0.843*        | <b>0.836*</b> | <b>0.822</b> | 0.779        | 0.842        | 0.825*        | 0.841*       | 0.816        | 0.825  |
|               | $F_{IS}$     | <b>0.197</b>  | <b>0.242</b>  | 0.163        | 0.215        | 0.142        | <b>0.205</b>  | 0.177        | 0.091        | 0.179  |
| H128          | $Ar_{(100)}$ | 22.0          | 23.3          | 25.7         | 19.9         | 21.5         | 21.7          | 22.9         | 22.3         | 22.4   |
|               | $H_e$        | 0.923         | 0.930         | 0.937*       | 0.923*       | 0.929*       | <b>0.915*</b> | 0.918        | 0.925        | 0.925  |
|               | $F_{IS}$     | -0.036        | 0.018         | 0.094        | <b>0.180</b> | <b>0.194</b> | <b>0.142</b>  | 0.069        | 0.082        | 0.093  |
| H059          | $Ar_{(100)}$ | 8.9           | 9.8           | 9.3          | 8.6          | 7.7          | 9.2           | 10.4         | 8.3          | 9.0    |
|               | $H_e$        | 0.797         | 0.808         | 0.797        | 0.818        | 0.779        | 0.759         | 0.806        | 0.814        | 0.797  |
|               | $F_{IS}$     | 0.049         | 0.042         | 0.082        | 0.153        | 0.191        | 0.136         | 0.100        | 0.115        | 0.109  |
| H249          | $Ar_{(100)}$ | 15.5          | 16.0          | 18.0         | 15.1         | 12.9         | 19.7          | 16.0         | 14.2         | 15.9   |
|               | $H_e$        | 0.871         | 0.883         | 0.861        | 0.870        | 0.874        | 0.865         | 0.854        | 0.873        | 0.869  |
|               | $F_{IS}$     | 0.093         | -0.023        | 0.038        | 0.092        | 0.139        | <b>0.136</b>  | 0.061        | 0.040        | 0.072  |
| H119          | $Ar_{(100)}$ | 14.6          | 15.4          | 14.6         | 15.0         | 16.1         | 14.5          | 14.6         | 13.7         | 14.8   |
|               | $H_e$        | 0.875         | 0.858         | 0.850        | 0.852        | 0.879        | 0.886*        | 0.865        | 0.833        | 0.862  |
|               | $F_{IS}$     | 0.033         | 0.023         | 0.026        | -0.003       | 0.144        | 0.146         | 0.099        | 0.058        | 0.066  |
| H555          | $Ar_{(100)}$ | 9.0           | 12.6          | 9.6          | 9.8          | 11.3         | 9.1           | 9.9          | 11.6         | 10.4   |
|               | $H_e$        | 0.827         | 0.815         | 0.810        | 0.823*       | 0.832        | 0.837         | 0.815        | 0.821        | 0.822  |
|               | $F_{IS}$     | 0.057         | -0.082        | 0.078        | 0.198        | -0.017       | -0.026        | 0.056        | -0.022       | 0.030  |
| H577          | $Ar_{(100)}$ | 11.4          | 11.6          | 13.8         | 9.3          | 11.8         | 11.0          | 12.6         | 10.8         | 11.5   |
|               | $H_e$        | 0.686         | 0.709         | <b>0.761</b> | 0.574        | 0.651        | 0.642         | 0.684        | 0.636        | 0.668  |
|               | $F_{IS}$     | -0.074        | -0.016        | 0.144        | -0.069       | -0.016       | 0.041         | -0.028       | -0.014       | -0.004 |
| H758          | $Ar_{(100)}$ | 14.8          | 18.4          | 15.4         | 18.0         | 14.6         | 15.6          | 14.8         | 16.7         | 16.0   |
|               | $H_e$        | <b>0.896*</b> | 0.911         | 0.901        | 0.907*       | 0.894        | <b>0.892*</b> | 0.894*       | 0.881*       | 0.897  |
|               | $F_{IS}$     | <b>0.179</b>  | <b>0.141</b>  | 0.085        | <b>0.183</b> | 0.158        | <b>0.143</b>  | <b>0.168</b> | <b>0.137</b> | 0.149  |
| H242          | $Ar_{(100)}$ | 7.4           | 8.8           | 8.2          | 9.2          | 7.3          | 7.1           | 7.9          | 9.0          | 8.1    |
|               | $H_e$        | 0.648         | <b>0.739</b>  | 0.620        | 0.668        | 0.744        | 0.651         | 0.686        | 0.671        | 0.678  |
|               | $F_{IS}$     | 0.102         | 0.142         | 0.098        | 0.156        | 0.133        | 0.194         | 0.071        | -0.009       | 0.111  |
| H45C          | $Ar_{(100)}$ | 6.9           | 7.2           | 6.3          | 7.6          | 7.0          | 7.2           | 7.6          | 8.2          | 7.3    |
|               | $H_e$        | 0.795         | 0.782         | 0.769        | 0.746        | 0.788        | 0.746         | 0.770        | 0.775        | 0.771  |
|               | $F_{IS}$     | -0.024        | 0.125         | 0.057        | 0.180        | 0.044        | 0.066         | 0.001        | 0.043        | 0.062  |
| Mean          | $Ar_{(100)}$ | 12.6          | 14.0          | 13.5         | 12.6         | 12.5         | 13.0          | 13.0         | 12.6         |        |
| 3-loci        | $H_e$        | 0.816         | 0.827         | 0.813        | 0.796        | 0.821        | 0.802         | 0.813        | 0.804        |        |
|               | $F_{IS}$     | 0.058         | 0.061         | 0.087        | 0.129        | 0.111        | 0.118         | 0.077        | 0.052        |        |
| Mean All loci | $Ar_{(100)}$ | 11.2          | 12.0          | 11.7         | 11.6         | 11.3         | 11.0          | 11.7         | 11.7         |        |
|               | $H_e$        | 0.780         | 0.780         | 0.776        | 0.784        | 0.789        | 0.767         | 0.802        | 0.792        |        |
|               | $F_{IS}$     | 0.045         | 0.074         | 0.057        | 0.122        | 0.093        | 0.076         | 0.071        | 0.078        |        |

**Supplementary Table 3 | Accession numbers, Mean sequencing depth (autosomes), karyotype and *kdr* genotypes for the individuals sequenced.**

| Individual code | ERS Accession        | Mean sequencing depth | Country       | Region        | Species (IGS/SINE assays) | 2L Karyotype | 2Rb Karyotype | 2Rd Karyotype | <i>kdr</i> genotype |
|-----------------|----------------------|-----------------------|---------------|---------------|---------------------------|--------------|---------------|---------------|---------------------|
| AJ0001-C        | ERS040121            | 29,8                  | Guinea Bissau | Leibala       | <i>A. gambiae</i>         | +/+          | +/+           | +/+           | L/L                 |
| AJ0007-C        | ERS040133            | 26,6                  | Guinea Bissau | Leibala       | <i>A. gambiae</i>         | +/+          | +/+           | +/+           | L/L                 |
| AJ0009-C        | ERS040129            | 31,5                  | Guinea Bissau | Leibala       | <i>A. gambiae</i>         | a/a          | b/+           | +/+           | L/L                 |
| AJ0011-C        | ERS040122            | 29,8                  | Guinea Bissau | Leibala       | <i>A. gambiae</i>         | a/a          | b/+           | +/+           | L/L                 |
| AJ0013-C        | ERS040137            | 32,7                  | Guinea Bissau | Safim         | <i>A. gambiae</i>         | +/+          | +/+           | d/d           | L/L                 |
| AJ0014-C        | ERS040120            | 20,8                  | Guinea Bissau | Safim         | <i>A. gambiae</i>         | a/a          | b/b           | +/+           | L/L                 |
| AJ0016-C        | ERS040130            | 33,4                  | Guinea Bissau | Safim         | <i>A. gambiae</i>         | +/+          | +/+           | d/+           | L/L                 |
| AJ0018-C        | ERS040123            | 22,7                  | Guinea Bissau | Safim         | <i>A. gambiae</i>         | +/+          | +/+           | d/d           | L/L                 |
| AJ0020-C        | ERS040132            | 25,4                  | Guinea Bissau | Safim         | <i>A. gambiae</i>         | +/+          | +/+           | +/+           | L/L                 |
| AA0006-C        | ERS012670            | 24,7                  | Ghana         | Greater Accra | <i>A. gambiae</i>         | -            | -             | -             | F/F                 |
| AA0007-C        | ERS012671            | 21,9                  | Ghana         | Greater Accra | <i>A. gambiae</i>         | -            | -             | -             | F/F                 |
| AA0008-C        | ERS012672            | 24,9                  | Ghana         | Greater Accra | <i>A. gambiae</i>         | -            | -             | -             | F/F                 |
| AA0009-C        | ERS012673            | 17,8                  | Ghana         | Greater Accra | <i>A. gambiae</i>         | -            | -             | -             | F/F                 |
| AJ0043-C        | ERS242776; ERS254362 | 27,9                  | Guinea Bissau | Antula        | <i>A. gambiae</i>         | -            | -             | -             | L/L                 |
| AJ0047-C        | ERS242791; ERS254358 | 20,2                  | Guinea Bissau | Antula        | <i>A. gambiae</i>         | -            | -             | -             | L/L                 |
| AJ0059-C        | ERS242792; ERS254321 | 31,9                  | Guinea Bissau | Antula        | <i>A. gambiae</i>         | -            | -             | -             | L/L                 |
| AJ0061-C        | ERS242801; ERS254310 | 25,7                  | Guinea Bissau | Antula        | <i>A. gambiae</i>         | -            | -             | -             | L/L                 |
| AJ0071-C        | ERS224332            | 34,1                  | Guinea Bissau | Antula        | <i>A. gambiae</i>         | -            | -             | -             | L/L                 |
| AJ0076-C        | ERS224284            | 35,4                  | Guinea Bissau | Antula        | <i>A. gambiae</i>         | -            | -             | -             | L/L                 |
| AJ0085-C        | ERS242803; ERS254298 | 87,2                  | Guinea Bissau | Antula        | <i>A. gambiae</i>         | -            | -             | -             | L/L                 |
| AJ0096-C        | ERS224313            | 35,1                  | Guinea Bissau | Antula        | <i>A. gambiae</i>         | -            | -             | -             | L/L                 |
| AJ0098-C        | ERS224312            | 33,6                  | Guinea Bissau | Antula        | <i>A. gambiae</i>         | -            | -             | -             | L/L                 |
| AJ0100-C        | ERS224272            | 32,5                  | Guinea Bissau | Antula        | <i>A. gambiae</i>         | -            | -             | -             | L/L                 |
| AJ0107-C        | ERS224805            | 29,7                  | Guinea Bissau | Antula        | <i>A. gambiae</i>         | -            | -             | -             | L/L                 |
| AJ0113-C        | ERS224286            | 31,7                  | Guinea Bissau | Antula        | <i>A. gambiae</i>         | -            | -             | -             | L/L                 |

**Supplementary Table 4 | Blood meal identification by ELISA according to STRUCTURE genetic clusters.**

| IgG-positive    | <i>A. coluzzii</i><br>(13) | <i>A. gambiae</i> -inland<br>(34) | <i>A. gambiae</i> -coast<br>(65) | Admixed<br>(23) |
|-----------------|----------------------------|-----------------------------------|----------------------------------|-----------------|
| Human           | 38.5                       | 82.4                              | 24.6                             | 34.8            |
| Bovine          | 30.8                       | 5.9                               | 43.1                             | 52.2            |
| Porcine         | 15.4                       | 8.8                               | 9.2                              | 0.0             |
| Canine          | 7.7                        | 0.0                               | 4.6                              | 4.3             |
| Bovine/porcine  | 0.0                        | 0.0                               | 4.6                              | 0.0             |
| Human/porcine   | 0.0                        | 0.0                               | 4.6                              | 0.0             |
| Human/bovine    | 0.0                        | 0.0                               | 0.0                              | 4.3             |
| Human/caprine   | 0.0                        | 0.0                               | 1.5                              | 0.0             |
| Caprine/porcine | 0.0                        | 0.0                               | 0.0                              | 4.3             |
| Other/negative  | 7.7                        | 2.9                               | 7.7                              | 0.0             |

In parenthesis: number of blood meals analyzed for each genetic cluster. Eight individuals with blood meal from Antula (6 *A. gambiae*; two admixed by IGS/SINE) were not included in microsatellite analysis.

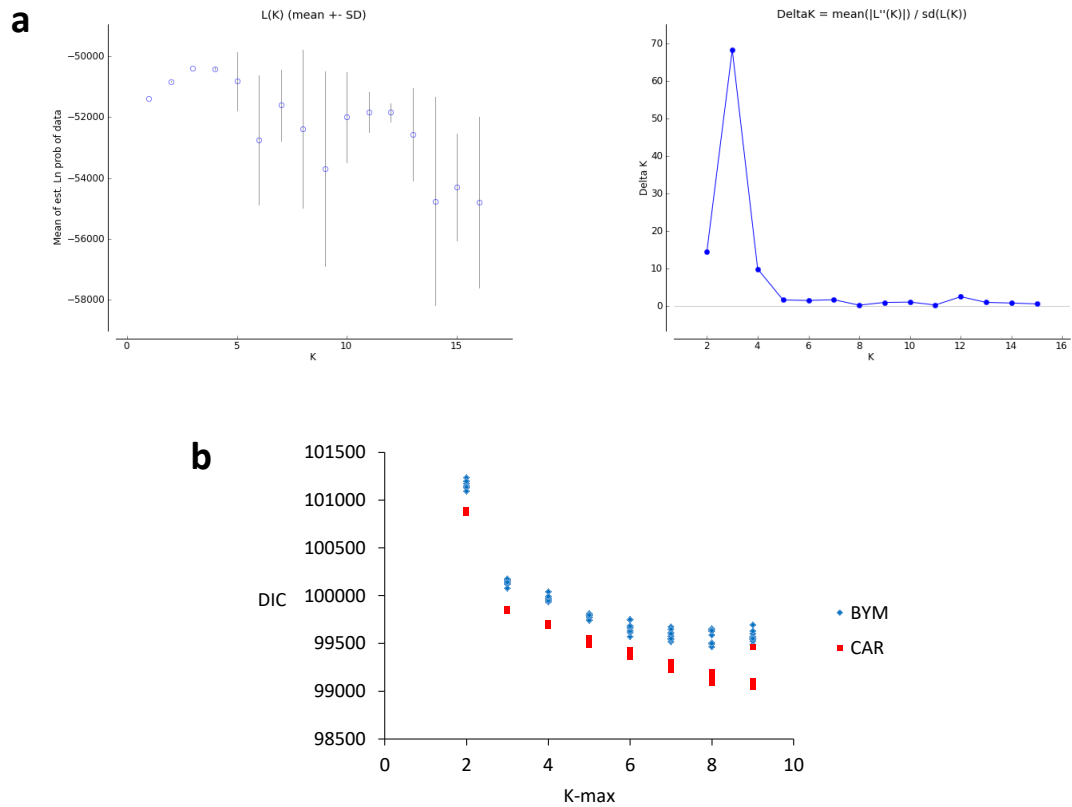

**Supplementary Figure 1| Inference of the number of clusters obtained from microsatellite-based Bayesian clustering (STRUCTURE) and spatially explicit (TESS) analyses (a) Plots for inferring  $K$  from STRUCTURE. Left plot is for the  $\ln[\Pr(X|K)]$  (Pritchard *et al.* 2000. *Genetics* 155, 945-959) and right plot for the  $\Delta K$  (Evanno *et al.* 2005. *Mol. Ecol.* 14, 2611-2620). (b) Deviance Information Criterion (DIC) plot for BYM and CAR models to infer the optimal number of clusters obtained by TESS (Chen *et al.* 2007. *Mol. Ecol. Notes* 7, 747-756).**

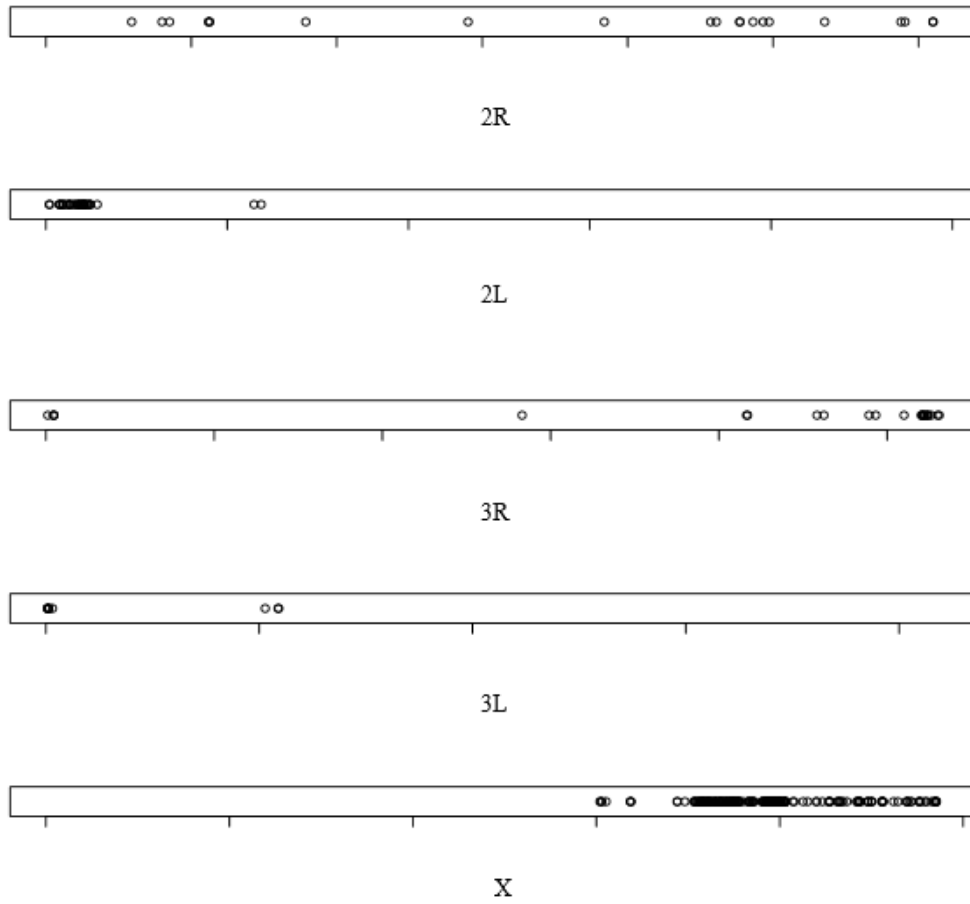

**Supplementary Figure 2 | Distribution of ancestry informative markers (AIMs).** Each bar represents a chromosome within which the relative location of the SNPs used in the AIM analysis is marked by circles.



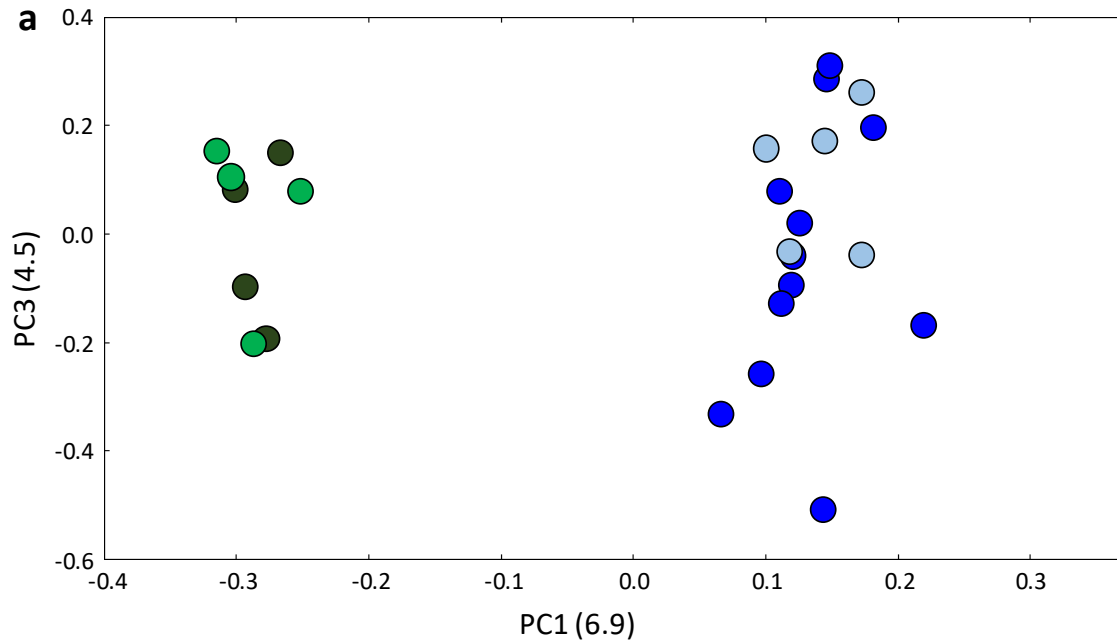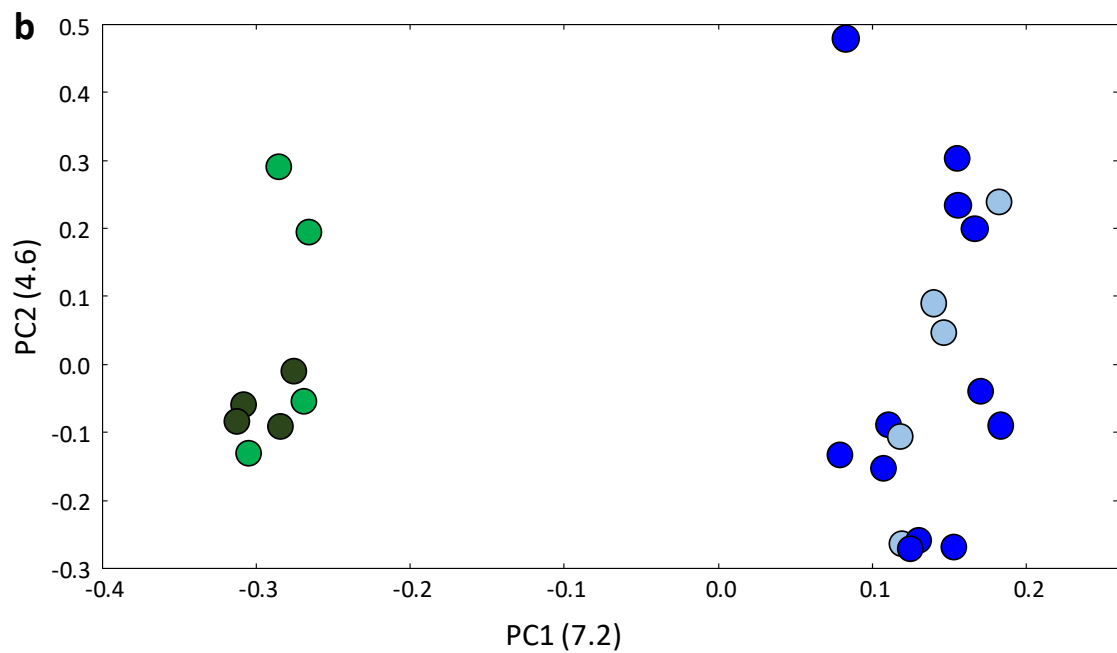

**Supplementary Figure 3| Principal Components Analysis for whole genome sequenced *A. gambiae*.** (a) Plot between principal components 1 and 3 for chromosome 3L variants. (b) Plot between principal components 1 and 2 for chromosome 3R variants. Sequenced sample are labelled as follows: Antula (blue), Safim (light blue), Leibala (green) and Accra-Ghana (dark green).

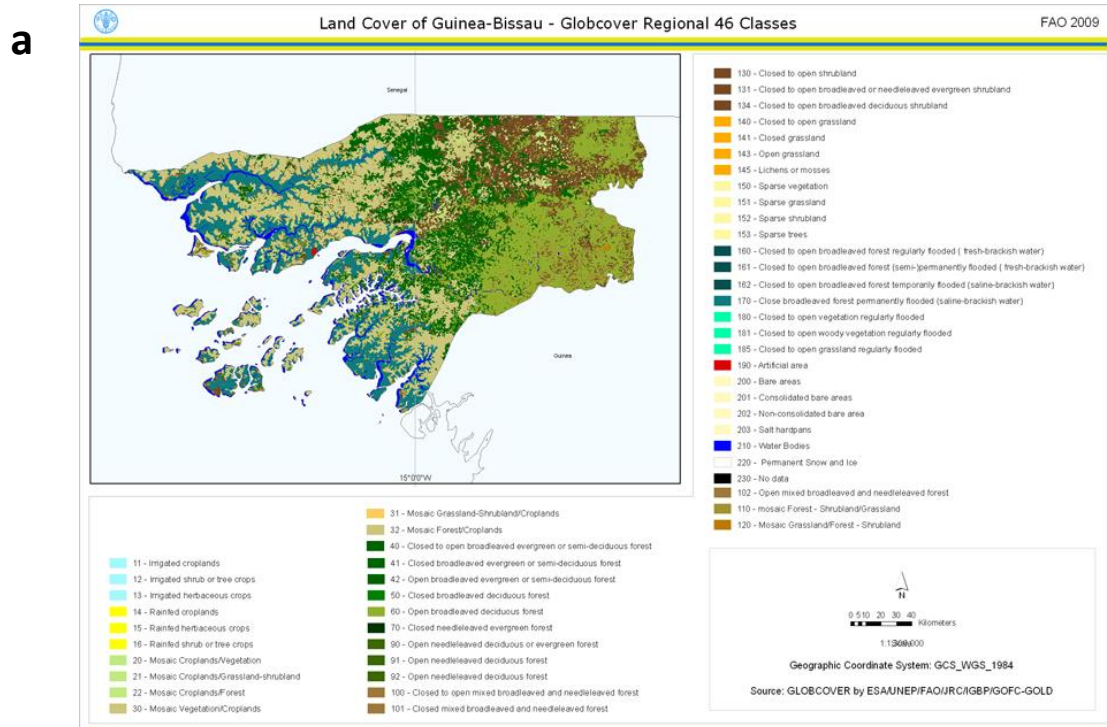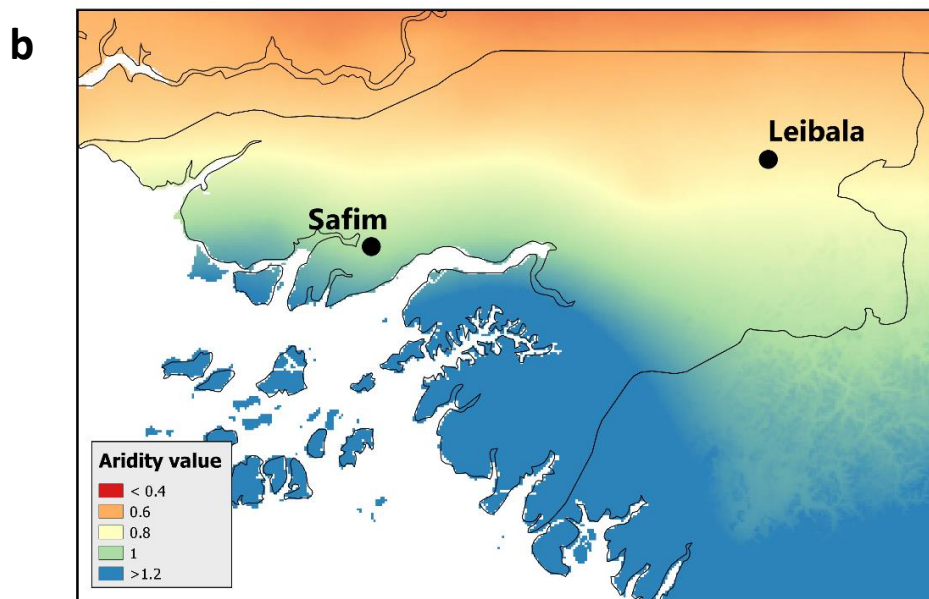

**Supplementary Figure 4| Landcover and aridity maps of Guinea Bissau. (a)** GlobCover 2009 land cover map of Guinea Bissau. Copyright notice: © ESA 2010 and UCLouvain. Available at: <http://www.fao.org/geonetwork/srv/en/metadata.show?id=37189&currTab=simple>. **(b)** aridity map for Guinea Bissau based on the CGIAR-CSI Global Aridity Index database. The map shows location of the two sites for which chromosomal data are available. Values are the mean Aridity Index from the 1950-2000 period at 30' spatial resolution (Trabucco, A., & Zomer, R.J. 2009. *Global Potential Evapo-Transpiration (Global-PET) and Global Aridity Index (Global-Aridity) Geo-Database*. CGIAR Consortium for Spatial Information. Available from the CGIAR-CSI GeoPortal at: <http://www.csi.cgiar.org>)
